# Supplementary material for: Topological insulator bismuth selenide grown on black phosphorus for sensitive broadband photodetection
Source: Royal Society of Chemistry journal article supplement (doi:10.1039/d1tc02613e), 2021-01-01
Supplement: d1tc02613e1.pdf [file d1tc02613e1.pdf]

## Supporting Information

Topological insulator bismuth selenide grown on black phosphorus for  
sensitive broadband photodetection

*Dae-Kyoung Kim, Seok-Bo Hong, Jonghoon Kim, and Mann-Ho Cho\**

Department of Physics, Yonsei University, Seoul 03722, Republic of Korea

Atomic-scale Surface Science Research Center, Yonsei University, Seoul 03722, Republic of  
Korea

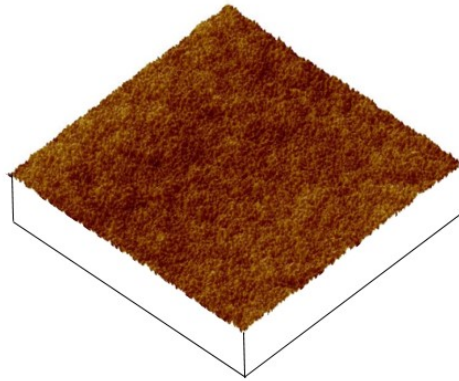

**BiSe** on BP flake as dep.

| <i>Process</i> | RMS ( <i>Rq</i> ) |
|----------------|-------------------|
| BS/BP          | 0.868nm           |

**Fig. S1** Atomic force microscopy (AFM) image of the as-grown Bi<sub>2</sub>Se<sub>3</sub> film on black phosphorus (BP) to a uniform and smooth surface with a small roughness of ~ 0.868 nm.

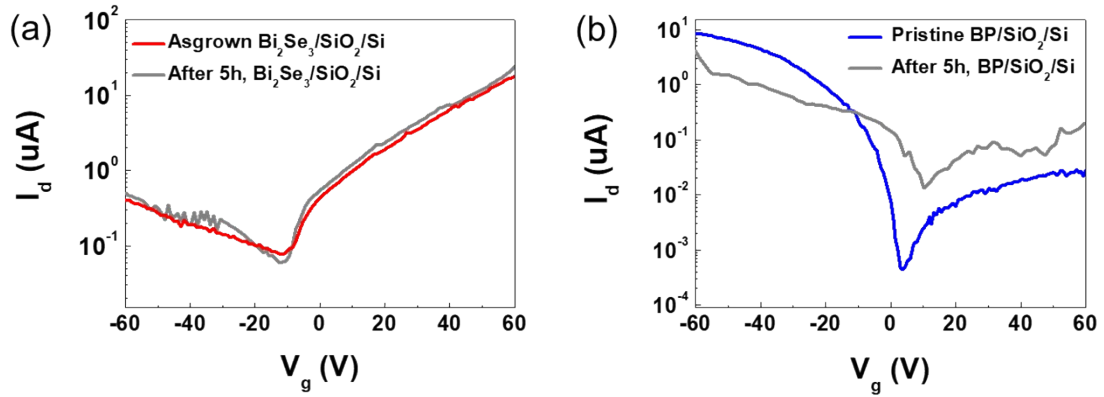

**Fig. S2** Comparison of the transfer characteristics of back gate (field-effect transistor (FET) devices of (a)  $\text{Bi}_2\text{Se}_3/\text{SiO}_2/\text{Si}$  and (b)  $\text{BP}/\text{SiO}_2/\text{Si}$  structures) before and after exposure for 5 h in air. The results of cumulative electrical measurements before and after exposure in air indicate that the BP surface exhibits more unstable carrier transport characteristics than the  $\text{Bi}_2\text{Se}_3$  surface.

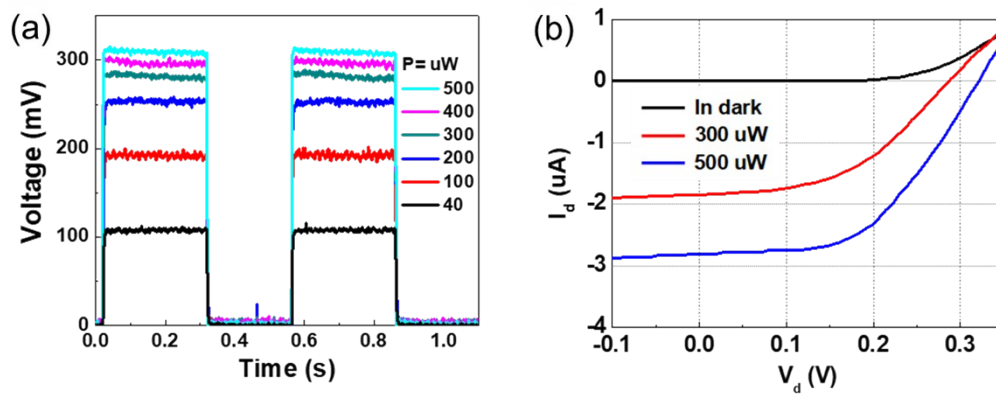

**Fig. S3** (a) Open-circuit voltage ( $V_{oc}$ ) of the  $\text{Bi}_2\text{Se}_3/\text{BP}$  heterostructure photodetector versus incident power, indicating a good self-driven performance of the photovoltaic device. (b)  $I_d$ - $V_d$  curves of the  $\text{Bi}_2\text{Se}_3/\text{BP}$  heterostructure under laser illumination at different incident power densities.

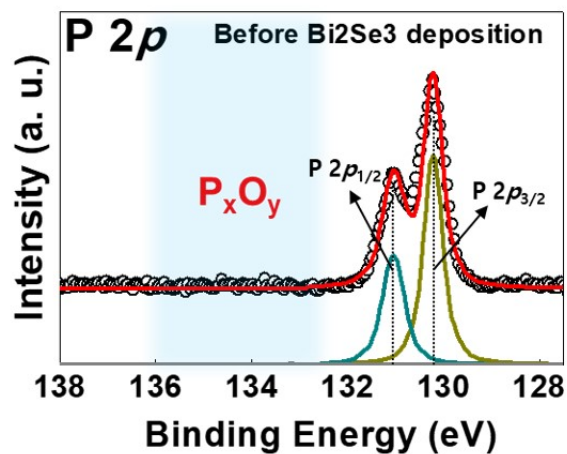

**Fig. S4** The P 2*p* core-level spectra of BP surface region before the deposition of Bi<sub>2</sub>Se<sub>3</sub>. BP substrate was performed using a vacuum desiccator with a rapid process progress until Bi<sub>2</sub>Se<sub>3</sub> deposition.
